# Supplementary material
Source: Springer Nature journal article supplement (https://www.springermedizin.de/resource/supplementary/12916_2014_969_MOESM3_ESM.pdf/9598942)

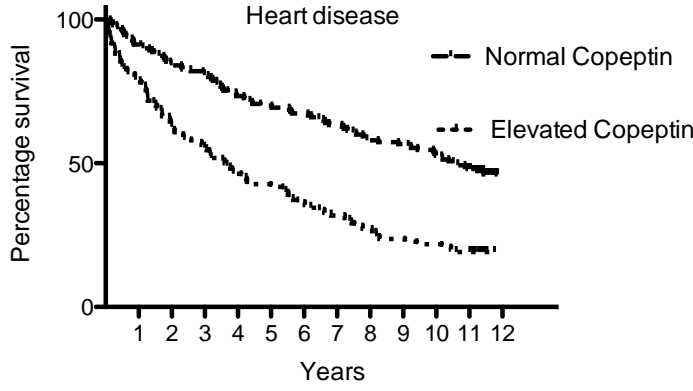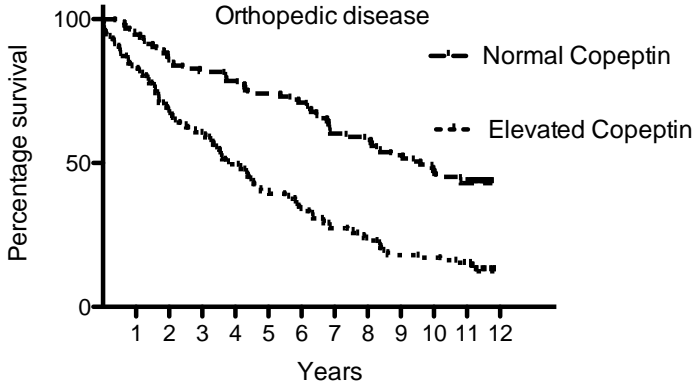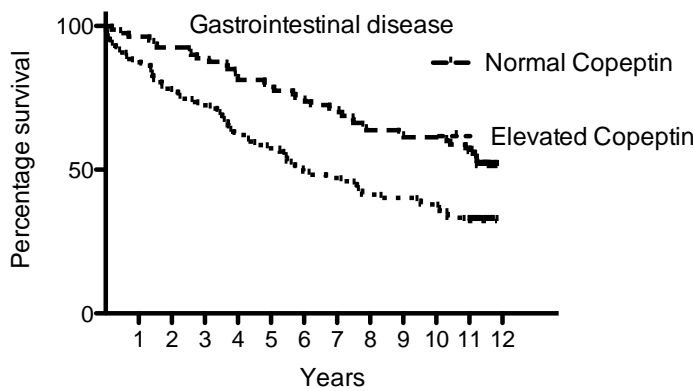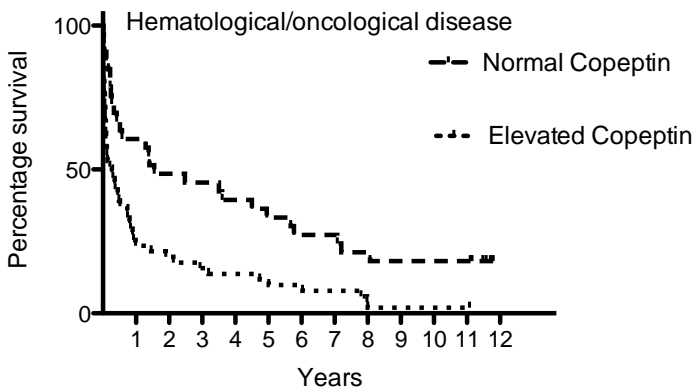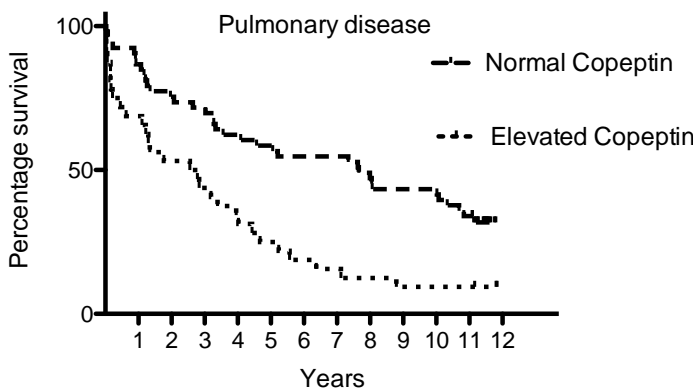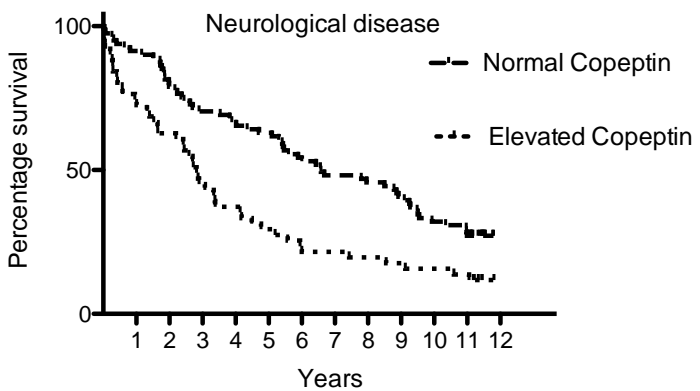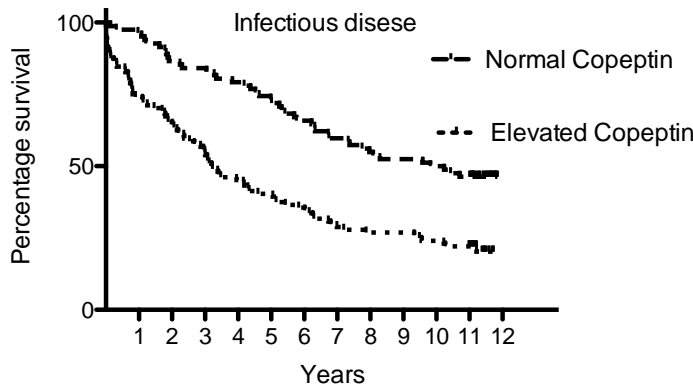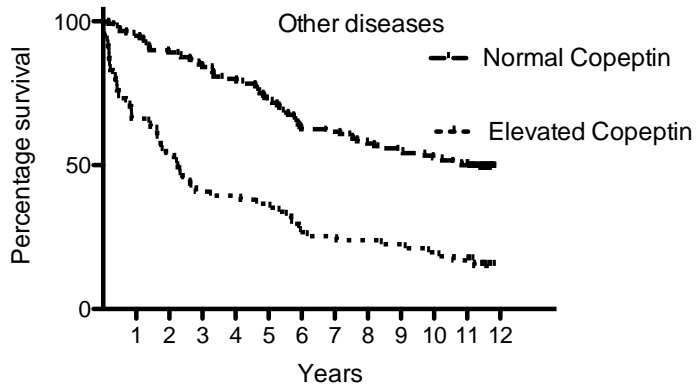

Supplement: MOESM3 [file 9598942]
